# Supplementary material for: A novel phosphor for glareless white light-emitting diodes
Source: Springer Nature journal article supplement (doi:10.1038/ncomms2138), 2012-10-16
Supplement: 41467_2012_BFncomms2138_MOESM1250_ESM.pdf [file 41467_2012_BFncomms2138_MOESM1250_ESM.pdf]

## Supplementary Figures

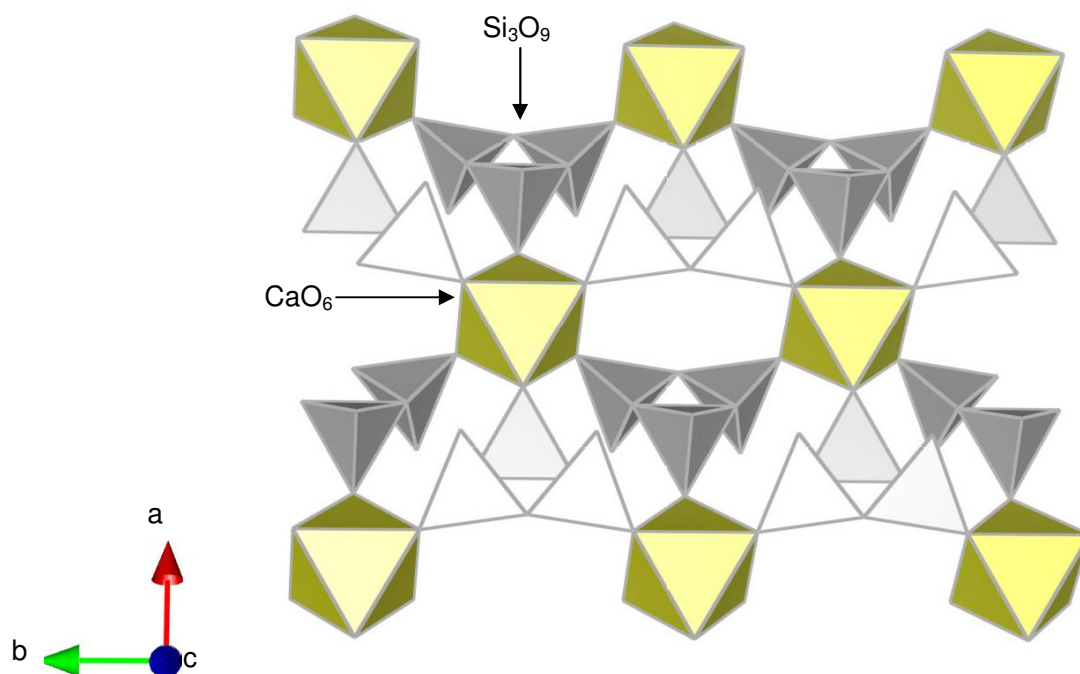

### Supplementary Figure S1 | Structure of the $[\text{Ca}(\text{SiO}_3)_6]$ framework.

The gray and white tetrahedra represent  $\text{SiO}_4$  complexes, and the yellow octahedra represent  $\text{M}(1)\text{O}_6$  complexes.

(a)

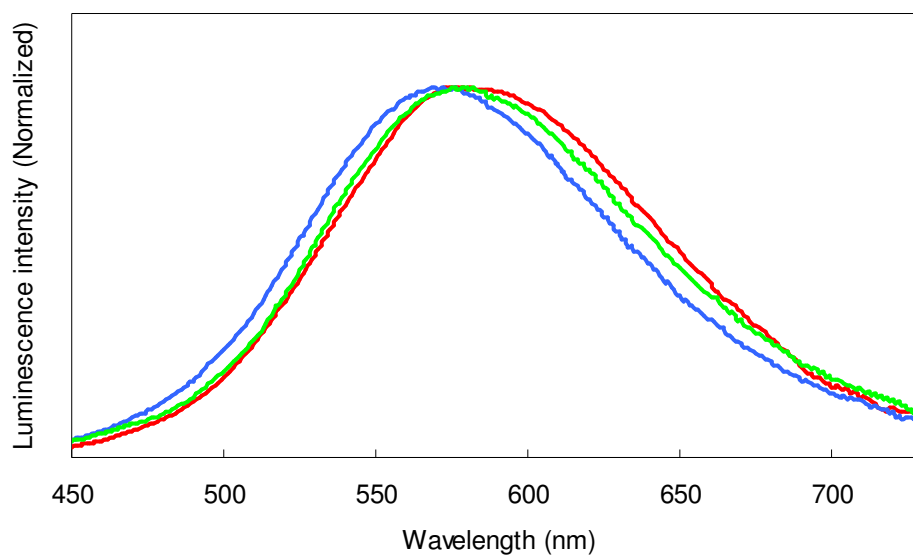

(b)

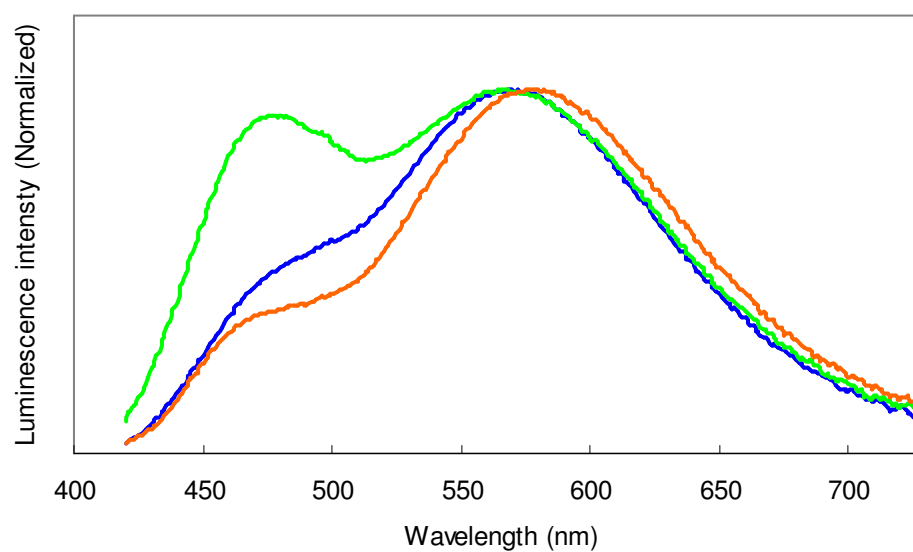

**Supplementary Figure S2 | Luminescence spectra of Cl\_MS:Eu<sup>2+</sup>.**

The spectra were measured at excitation wavelengths of (a) 400 nm and (b) 310 nm. The chemical compositions of the phosphors were as follows:  $(\text{Ca}_{0.34}\text{Sr}_{0.62}\text{Eu}_{0.04})_7(\text{SiO}_3)_6\text{Cl}_2$  ( $\lambda_D = 574.2$  nm, blue curve),  $(\text{Ca}_{0.40}\text{Sr}_{0.56}\text{Eu}_{0.04})_7(\text{SiO}_3)_6\text{Cl}_2$  ( $\lambda_D = 575.8$  nm, green curve) and  $(\text{Ca}_{0.58}\text{Sr}_{0.38}\text{Eu}_{0.04})_7(\text{SiO}_3)_6\text{Cl}_2$  ( $\lambda_D = 577.9$  nm, red curve).

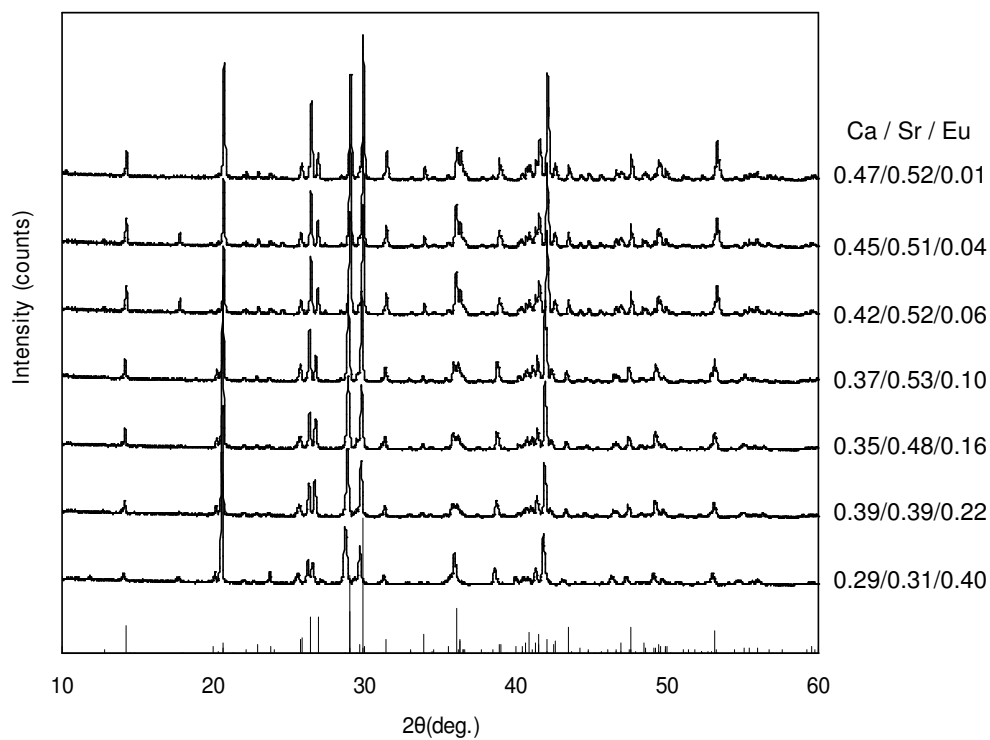

**Supplementary Figure S3 | XRD patterns of Cl\_MS:Eu<sup>2+</sup> with various Eu<sup>2+</sup> concentrations.**

The right-side values were Ca/Sr/Eu ratios. The pattern of the Cl\_MS single crystal was provided at the bottom. The X-ray diffraction patterns of all samples were congruous with the pattern of the Cl\_MS single crystal. These samples consisted almost completely of a single phase; only a few impurity peaks were observed.

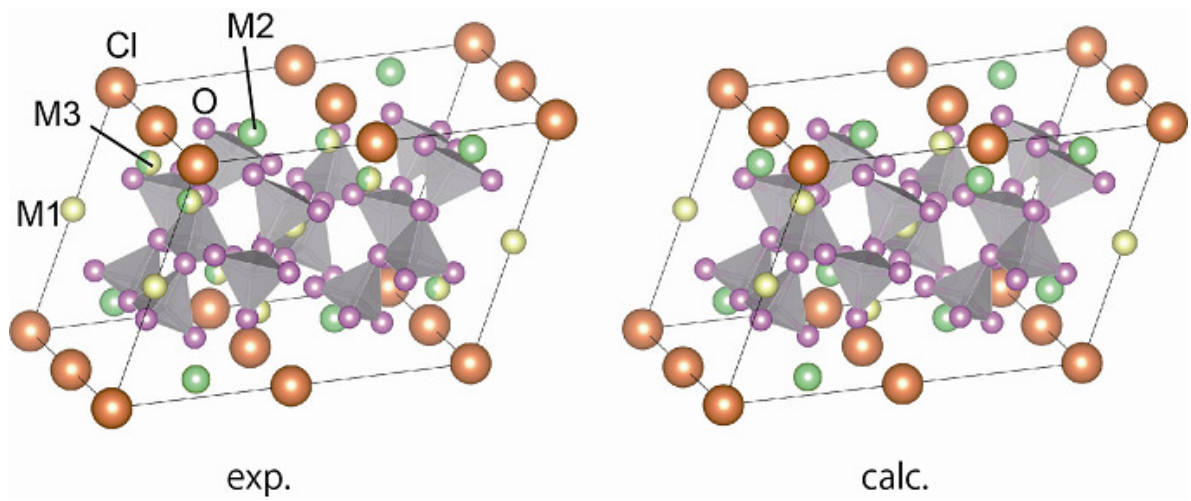

Exp.:  $a = 13.2925 \text{ \AA}$ ,  $b = 8.33060 \text{ \AA}$ ,  $c = 9.17510 \text{ \AA}$ ,  $\alpha = 90.0^\circ$ ,  $\beta = 110.2740^\circ$ ,  $\gamma = 90.0^\circ$

Calc.:  $a = 13.2626 \text{ \AA}$ ,  $b = 8.26260 \text{ \AA}$ ,  $c = 9.11170 \text{ \AA}$ ,  $\alpha = 89.5587^\circ$ ,  $\beta = 110.1988^\circ$ ,  $\gamma = 91.0852^\circ$

**Supplementary Figure S4 | Experimental and calculated structures of Cl\_MS:Eu<sup>2+</sup>.** Schematic illustration of the structure of  $\text{CaSr}_2(\text{Ca}_{0.55}\text{Sr}_{0.45})_4\text{Si}_6\text{O}_{18}\text{Cl}_2$  at 100 K as determined by single-crystal X-ray diffraction (exp) and the relaxed structure calculated by the projected augmented plane-wave method (calc).

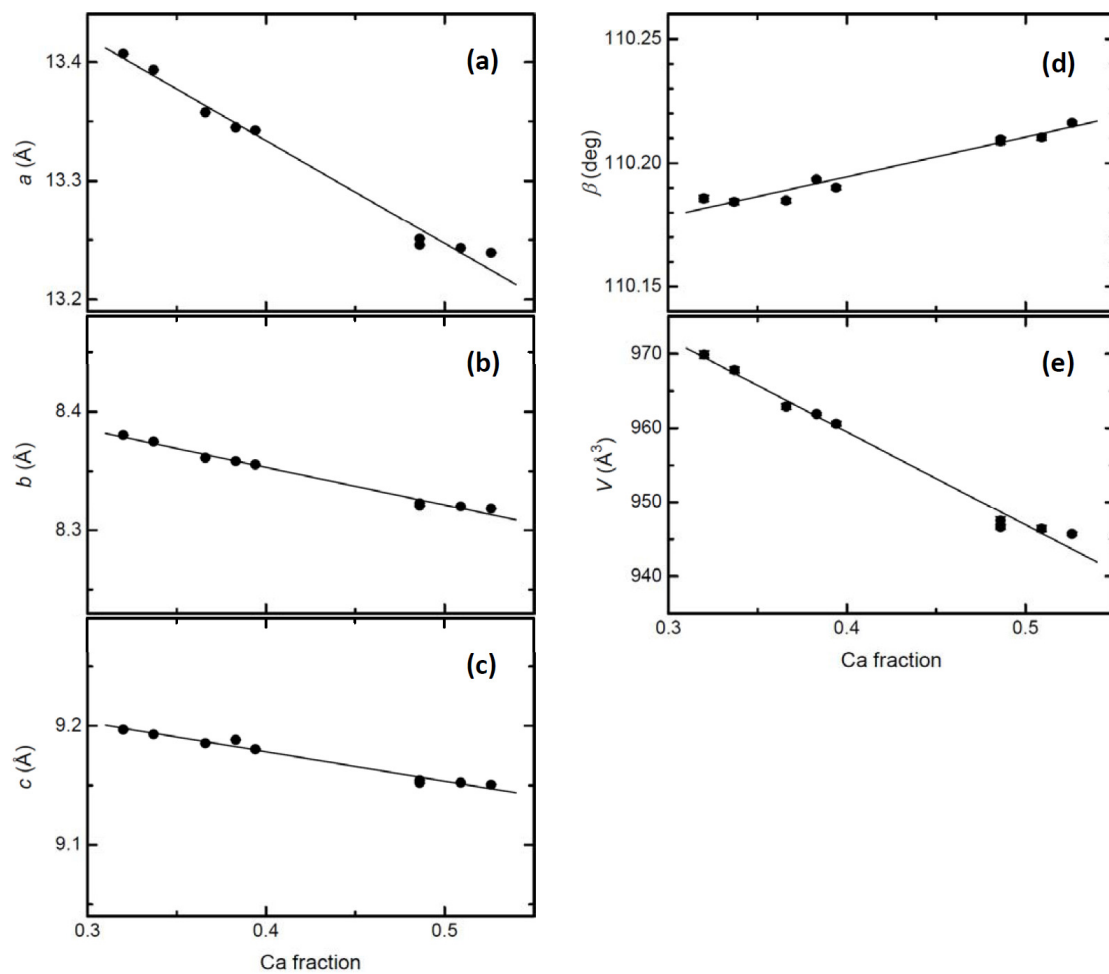

**Supplementary Figure S5 | Lattice constants of Cl<sub>MS</sub>:Eu<sup>2+</sup> as a function of Ca fraction.**

Lattice constants  $a$ ,  $b$ ,  $c$ ,  $\beta$  and unit cell volume  $V$  are plotted in **a**, **b**, **c**, **d** and **e**, respectively. Lattice contraction with increasing Ca fraction was greater along the  $a$ -axis than along the  $b$ - and  $c$ -axes.

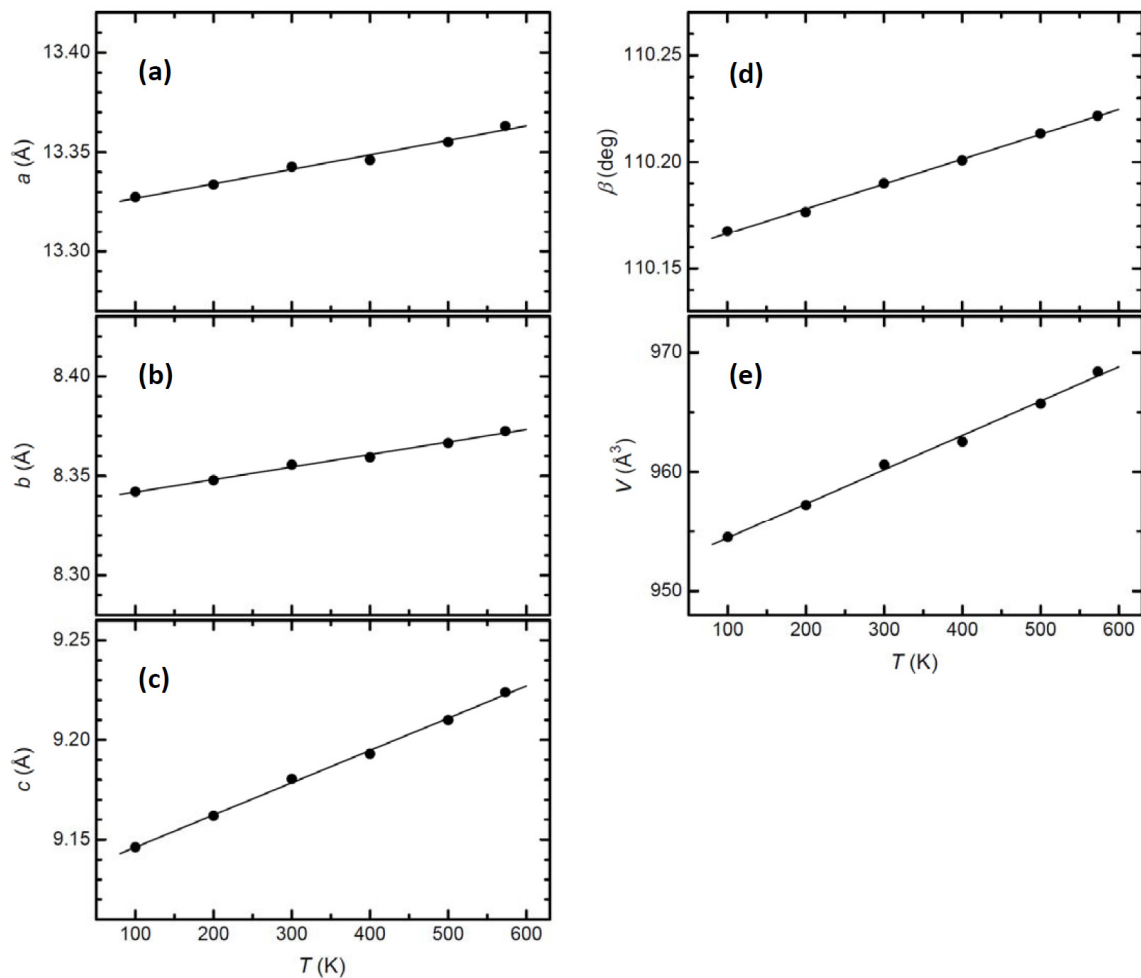

**Supplementary Figure S6 | Lattice constants of Cl\_MS:Eu<sup>2+</sup> as a function of temperature.**

The chemical composition of Cl\_MS:Eu<sup>2+</sup> was (Ca<sub>0.40</sub>Sr<sub>0.56</sub>Eu<sub>0.04</sub>)<sub>7</sub>(SiO<sub>3</sub>)<sub>6</sub>Cl<sub>2</sub>. Lattice constants *a*, *b*, *c*, *β* and unit cell volume *V* are plotted in **a**, **b**, **c**, **d** and **e**, respectively. The linear thermal expansion coefficients along the *a*-, *b*- and *c*-axes at 300 K were  $5.4 \times 10^{-6}$ ,  $7.5 \times 10^{-6}$  and  $1.8 \times 10^{-5}$ , respectively.

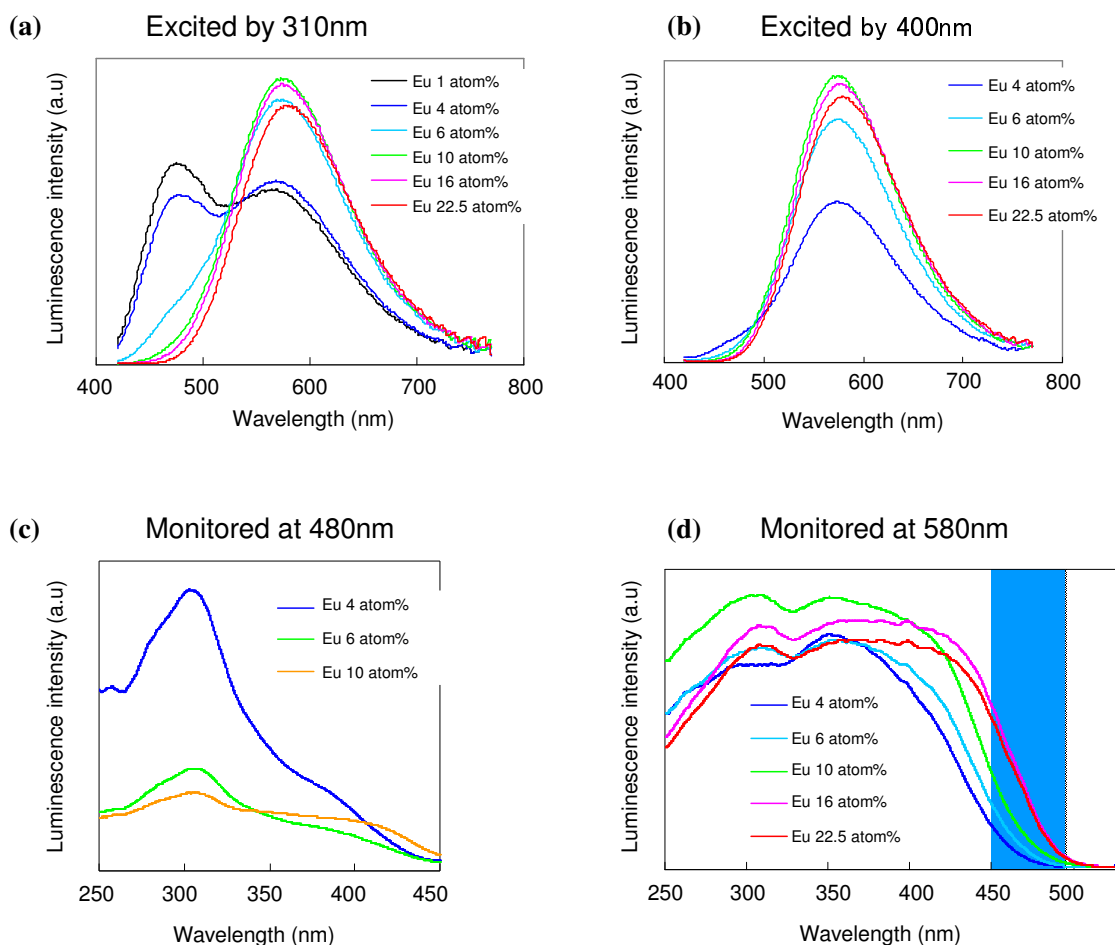

### Supplementary Figure S7 | Concentration quenching of Cl<sub>MS</sub>:Eu<sup>2+</sup>.

(a, b) Luminescence spectra of Cl<sub>MS</sub>:Eu<sup>2+</sup> species with various Eu<sup>2+</sup> concentrations upon excitation at 310 and 400 nm, respectively. (c, d) Excitation spectra of Cl<sub>MS</sub>:Eu<sup>2+</sup> species with various Eu<sup>2+</sup> concentrations monitored at 480 and 580 nm, respectively. The area hatched in blue in **d** indicates the wavelength of blue light. When the Eu<sup>2+</sup> concentration exceeded 4 atom%, the 480-nm band was drastically affected by concentration quenching in **a** and **c**. The main emission band (580 nm) of Cl<sub>MS</sub>:Eu<sup>2+</sup> exhibited no concentration quenching in **b**. In **d**, as the Eu<sup>2+</sup> concentration was increased, the band extended toward the long-wavelength side with no decrease in intensity. However, in the sample with the highest intensity (10 atom% Eu), the absorption in the blue region was weak.

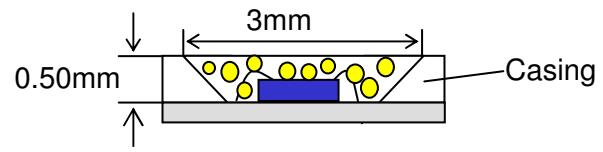

**Supplementary Figure S8 | Schematic of surface-mount device (SMD) pc-LED.**



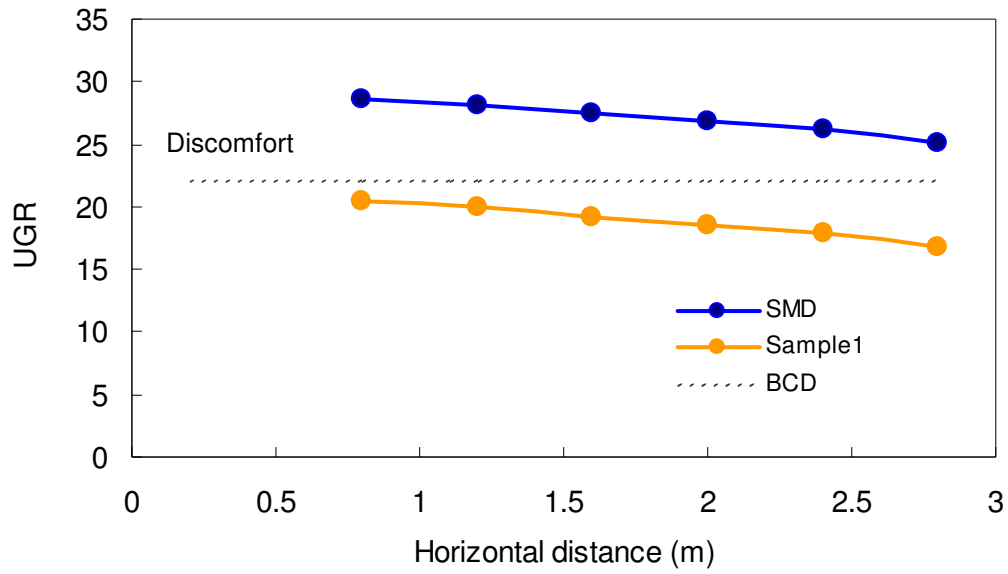

**Supplementary Figure S9 | Unified glare ratings (UGRs) of sample 1 and SMD pc-LEDs as a function of horizontal distance T.**

The dotted line indicates the borderline between comfort and discomfort (BCD). The UGR of sample 1 was below the BCD at all horizontal distances.

## Supplementary Tables

---

| $(\text{Ca}_{0.46}\text{Sr}_{0.54})_7(\text{SiO}_3)_6\text{Cl}_2$ |                              |                              |
|-------------------------------------------------------------------|------------------------------|------------------------------|
| <b>Data collection</b>                                            |                              |                              |
| Temperature                                                       | 100 K                        | 300 K                        |
| Space group                                                       | <i>C2/m</i>                  | <i>C2/m</i>                  |
| Cell dimensions                                                   |                              |                              |
| <i>a</i> (Å)                                                      | 13.2688(3)                   | 13.2925(4)                   |
| <i>b</i> (Å)                                                      | 8.3249(2)                    | 8.3306(2)                    |
| <i>c</i> (Å)                                                      | 9.1323(3)                    | 9.1751(2)                    |
| $\alpha, \beta, \gamma$ (°)                                       | 90, 110.234(2), 90           | 90, 110.274(2), 90           |
| Resolution (Å)                                                    | 0.60                         | 0.60                         |
| $R_{\text{merge}}$                                                | 0.0281                       | 0.0159                       |
| $\  \delta I$                                                     | > 0                          | > 0                          |
| Completeness (%)                                                  | 0.966                        | 0.999                        |
| Redundancy                                                        | 4.25                         | 5.23                         |
| <b>Refinement</b>                                                 |                              |                              |
| Resolution (Å)                                                    | 0.60                         | 0.60                         |
| No. reflections                                                   | 2335                         | 2422                         |
| $R1$                                                              | 0.0249 ( $\  \delta I > 2$ ) | 0.0207 ( $\  \delta I > 2$ ) |
| No. atoms                                                         | 14                           | 14                           |

---

Supplementary Table S1 | X-ray crystal structure determination of undoped single-crystal Cl\_MS.

| <i>T</i> (K) | <i>a</i> , <i>b</i> , <i>c</i> , $\beta$ , <i>V</i>       | <i>R</i> <sub>WP</sub> , <i>R</i> <sub>I</sub> |
|--------------|-----------------------------------------------------------|------------------------------------------------|
| 100          | 13.3276(2), 8.3421(1), 9.1462(1),<br>110.168(1), 954.5(4) | 0.0574, 0.0460                                 |
| 200          | 13.3338(2), 8.3479(1), 9.1619(1),<br>110.177(1), 957.2(4) | 0.0605, 0.0485                                 |
| 300          | 13.3427(1), 8.3557(1), 9.1805(1),<br>110.190(1), 960.6(3) | 0.0577, 0.0451                                 |
| 400          | 13.3461(2), 8.3594(1), 9.1930(1),<br>110.201(1), 962.5(4) | 0.0602, 0.0511                                 |
| 500          | 13.3551(2), 8.3666(1), 9.2100(1),<br>110.213(1), 965.7(4) | 0.0635, 0.0544                                 |
| 573          | 13.3632(2), 8.3725(1), 9.2239(1),<br>110.222(1), 968.4(4) | 0.0627, 0.0502                                 |

**Supplementary Table S2 | Temperature dependence of the Rietveld refinements of Cl\_MS:Eu<sup>2+</sup> powder.**

The temperature dependence of the crystal structure of Cl\_MS:Eu<sup>2+</sup> was investigated at 100, 200, 300, 400, 500 and 573 K with a powder sample with a chemical composition of (Ca<sub>0.40</sub>Sr<sub>0.56</sub>Eu<sub>0.04</sub>)<sub>7</sub>(SiO<sub>3</sub>)<sub>6</sub>Cl<sub>2</sub>. The lattice constants and the reliability factors of Cl\_MS:Eu<sup>2+</sup> were determined from the Rietveld refinements. No phase transitions were observed from 100 to 573 K.

| Chemical composition                                                              | Emission colour | Internal quantum efficiency | Absorption |
|-----------------------------------------------------------------------------------|-----------------|-----------------------------|------------|
| $(\text{Ca}_{0.45}\text{Sr}_{0.51}\text{Eu}_{0.04})_7(\text{SiO}_3)_6\text{Cl}_2$ | Yellow          | 0.98                        | 0.49       |
| $(\text{Ca}_{0.42}\text{Sr}_{0.52}\text{Eu}_{0.06})_7(\text{SiO}_3)_6\text{Cl}_2$ | Yellow          | 0.97                        | 0.74       |
| $(\text{Ca}_{0.37}\text{Sr}_{0.53}\text{Eu}_{0.10})_7(\text{SiO}_3)_6\text{Cl}_2$ | Yellow          | 0.94                        | 0.90       |
| $(\text{Ca}_{0.35}\text{Sr}_{0.49}\text{Eu}_{0.16})_7(\text{SiO}_3)_6\text{Cl}_2$ | Yellow          | 0.88                        | 0.94       |
| $(\text{Ca}_{0.39}\text{Sr}_{0.39}\text{Eu}_{0.22})_7(\text{SiO}_3)_6\text{Cl}_2$ | Yellow          | 0.84                        | 0.95       |
| $(\text{Ca}_{0.29}\text{Sr}_{0.31}\text{Eu}_{0.40})_7(\text{SiO}_3)_6\text{Cl}_2$ | Yellow          | 0.49                        | 0.94       |
| $(\text{Ca,Sr,Eu})_5(\text{PO}_4)_3\text{Cl}$                                     | Blue            | 0.99                        | 0.91       |
| $(\text{Ba,Eu})\text{MgAl}_5\text{O}_{17}$                                        | Blue            | 0.97                        | 0.69       |
| $(\text{Sr,Eu})\text{Ga}_2\text{S}_4$                                             | Green           | 0.90                        | 0.83       |
| $(\text{Ba,Sr,Eu})_2\text{SiO}_4$                                                 | Yellow          | 0.90                        | 0.92       |
| $(\text{Ca,Eu})\text{S}$                                                          | Red             | 0.72                        | 0.70       |
| $(\text{Sr,Ca,Eu})\text{AlSiN}_3$                                                 | Red             | 0.94                        | 0.74       |

**Supplementary Table S3 | Internal quantum efficiency (IQE) and absorption of  $\text{Cl}_{\text{MS}}:\text{Eu}^{2+}$  and other phosphors.**

Even though the  $\text{Eu}^{2+}$  fraction in  $\text{Cl}_{\text{MS}}:\text{Eu}^{2+}$  increased more than 20 atom%, the IQEs of  $\text{Cl}_{\text{MS}}:\text{Eu}^{2+}$  declined only slightly.

| pc-LED   | Luminous flux<br>(lm) | Colour rendering index<br>(Ra) | Colour temperature<br>(K) |
|----------|-----------------------|--------------------------------|---------------------------|
| Sample 1 | 88                    | 82                             | 4,100                     |
| Sample 2 | 79                    | 71                             | 4,900                     |
| Sample 3 | 60                    | 87                             | 3,900                     |

**Supplementary Table S4 | Performance of the fabricated pc-LEDs.**

Sample 1, violet chip coupled with  $(\text{Ca}_{0.37}\text{Sr}_{0.53}\text{Eu}_{0.10})_7(\text{SiO}_3)_6\text{Cl}_2$  and the blue phosphor  $\text{APT:Eu}^{2+}$ . Sample 2, blue chip coupled with  $\text{YAG:Ce}^{3+}$ . Sample 3, violet chip coupled with mixture of  $\text{APT:Eu}^{2+}$ ,  $\beta\text{-SiAlON:Eu}^{2+}$  and  $\text{S-CASN:Eu}^{2+}$ . The performance of the samples was observed at an operation current of 350 mA.

## Supplementary Methods

**Crystal structure determination.** Single-crystal synchrotron radiation X-ray diffraction (SR-XRD) experiments on an undoped  $(\text{Ca}_{0.46}\text{Sr}_{0.54})_7(\text{SiO}_3)_6\text{Cl}_2$  (Cl\_MS) crystal were carried out with the large cylindrical imaging plate camera<sup>42</sup> at SPring-8 beamline BL02B1 (Hyogo, Japan). The crystal ( $50 \times 40 \times 10 \mu\text{m}^3$ ) was mounted on a glass rod. The wavelength of the incident X-rays was ca.  $0.35 \text{ \AA}$ . The sample temperature was controlled at 100 or 300 K by means of a low-temperature  $\text{N}_2$  gas flow system. The initial atomic positions were determined by a direct method using SIR2004<sup>43</sup>. The structure model was refined by full-matrix least-squares methods with anisotropic displacement parameters using SHELXL-97<sup>44</sup>.

Powder SR-XRD experiments for nine  $\text{Eu}^{2+}$ -doped Cl\_MS powder samples were carried out with the large Debye–Scherrer camera<sup>45</sup> at SPring-8 beamline BL02B2. The wavelength of the incident X-rays was ca.  $0.80 \text{ \AA}$ . Diffraction patterns of Cl\_MS:Eu<sup>2+</sup> samples sealed in glass capillaries were recorded on the imaging plate. Sample temperatures were controlled by means of a  $\text{N}_2$  gas flow system. Structure refinements based on the undoped Cl\_MS structure were carried out by means of the Rietveld method using SP<sup>46</sup> with a resolution of  $d > 0.66 \text{ \AA}$ .

**Concentration quenching of Cl\_MS:Eu<sup>2+</sup>.** Samples for concentration quenching studies were prepared by the self-flux method. The phase purity of the resulting powders was checked by X-ray powder diffraction with a Rigaku RINT-Ultima III diffractometer with Cu K $\alpha$  radiation at 40 kV and 40 mA. The chemical composition was determined by X-ray fluorescence analysis (Rigaku RIX1000). The optical measurements of these samples are described in the Methods section of the main text.

**Comparison of pc-LEDs with a surface-mount device (SMD) pc-LED.** We calculated the unified glare ratings (UGRs) of the sample 1 pc-LED and a SMD pc-LED by means of the following equation:

$$\text{UGR} = 8 \log[(0.25/L_b) \cdot \Sigma(L^2 \omega/p^2)] \quad (\text{S1})$$

where  $L_b$  is the background luminance ( $\text{cd/m}^2$ ),  $L$  is the source luminance ( $\text{cd/m}^2$ ),  $\omega$  is the solid angle of the source (sr), and  $p$  is the position index (describing the positional relationship between the light source and the line of sight)<sup>47</sup>. We assumed an indoor environment and chose  $50 \text{ cd/m}^2$  for the background luminance. The values of the luminance were adopted as the source luminance, when the sample 1 and the SMD pc-LEDs were operated at 350 mA. The position index  $p$  was determined from the location of an observer and the light source. The location of the light source was indicated by three distance elements: a parallel direction R, a vertical direction H and a horizontal direction T to the fixation axis of an observation. This calculation was performed with  $R =$

1 m, H = 2 m and T = 0.8–2.8 m.

### Supplementary References

42. Sugimoto, K *et al.* Extremely high resolution single crystal diffractometry for orbital resolution using high energy synchrotron radiation at SPring - 8. *AIP Conf. Proc.* **1234**, 887 (2010).
43. Burla, M.C. *et al.* SIR2004: an improved tool for crystal structure determination and refinement. *J Appl. Cryst.* **38**, 381 (2005).
44. Sheldrick, G. M. A short history of SHELX. *Acta Cryst. A* **64**, 112 (2008).
45. Nishibori, E *et al.* The large Debye–Scherrer camera installed at SPring-8 BL02B2 for charge density studies. *Nucl. Instrum. Meth. A* **467-468**, 1045 (2001).
46. Nishibori, E *et al.* Accurate structure factors and experimental charge densities from synchrotron X-ray powder diffraction data at SPring-8. *Acta Cryst. A* **63**, 43 (2007).
47. Guth, S. K. A method for the evaluation of discomfort glare. *Illum. Eng.* **58**, 351-364 (1963).
